# Supplementary material for: Towards a Universal Ovarian Cancer Biomarker Model: Clinical Validation of Trx1 and CA125 Dual Strategy
Source: Research Square preprint supplement (doi:10.21203/rs.3.rs-7359728/v1), 2025-09-22
Supplement: Supplementary file 1 [file 2cc05e03af1c5bcb45957757.xlsx]

## Sheet: Cancer
No.	bCODE	CA125 (U/ml)	HE4 (pmol/L)	Trx1 (U/ml)	ROMA	DORA	Menopause	Age	pathology report (Ovary)	FIGO stage	Past medical History	Past surgical history
1	04004438	526.629	3156	23.25	99.2433	96.1656	1 (Menopause)	76	High grade papilary serous	IIIC
2	04008658	697.39	399	14.3591	93.4844	96.1882	0 (menstruation)	47	High grade papilary serous	IIIC	Hepatitis A
3	04026750	0.935484	39.7	20.55	3.75952	2.80322	0	33	Serous borderline tumor	IA
4	04030593	0.317073	40.7	14.3591	3.72881	0.734992	0	40	Granulos cell	1A		C/sec
5	04048579	673.878	48.8	10.3091	67.2781	95.2216	1	58	Clear	IC	Leiomyoma	TAH
6	04054916	152.855	833	40.8045	92.993	90.499	1	76	High grade papilary serous	IVB	HTN
7	04086381	4.19512	61	16.85	10.6561	11.1086	0	43	Clear	IA		H/S P/P M/M , P/S M/M
8	04086435	5.77419	62.5	9.68182	7.54429	11.1426	1	63	High grade papilary serous	IVA
9	04092462	67.1951	373	36.2455	75.922	78.8152	1	55	Mucinous	IIIB		C/sec
10	04118853	276.78	211	35.4227	83.0916	94.2468	1	63	High grade papilary serous	IIIA1	Thyroid Ca, A-fib, CI	Appendectomy, Thyroid lobectomy
11	04119165	61.2258	45.8	28.3727	24.9575	74.4176	1	55	High grade papilary serous	IIIa		P/S BSO
12	04131006	440.22	213	12.3636	87.4531	93.4117	1	67	High grade papilary serous	IIIC	Hypertension, Diabetes
13	04132269	2.19512	39.4	88.1091	2.42744	14.5983	1	63	Granulos cell	IC	Cx Ca	TAH LSO Appendectomy
14	04140837	0.609756	58.9	30.4455	1.45825	2.27265	1	52	Mucinous	IA	Breast Ca	Lt mastectomy, C/sec
15	04158005	525.146	89.5	26.3636	76.2968	96.4253	1	77	High grade papilary serous	IIIB	Hypertension, Hyperlipidemia	Appendectomy, Thyroid surgery
16	04201671	425.306	782	160.55	96.3349	98.4658	1	61	High grade papilary serous	IVA		TLH
17	04208704	297.871	91.7	21.3682	68.5512	92.8833	1	55	Mucinous	IA	Hyperlipidemia, Hypothyroidism
18	04216223	4.07317	54.3	23.3136	8.27834	12.8416	0	32	Mucinous	IA
19	04250537	738.146	602	11.5227	96.772	95.9125	1	81	High grade papilary serous	IIIC	Hypertension
20	04251414	12.0488	72	15.4273	15.8995	26.5451	0	49	Clear	IC		C/sec
21	04257498	7.91935	126	40.0636	41.0933	29.1991	0	45	Endometroid	IA
22	04272737	51.0732	112	16.7909	42.4674	63.6394	1	63	Mucinous	IC1		Small intestine surgery
23	04289876	12.0806	82.8	109.186	15.8017	54.1236	1	82	Adult granulosa cell tumor	Ia	HTN
24	04304728	181.122	204	97.9773	72.7623	95.081	0	49	High grade papilary serous	IIIA1		C/sec
25	04312136	852.073	559	50.3864	96.8583	98.5184	1	82	High grade papilary serous	IIIC	Hypertension	Cholecystectomy
26	04314643	9.24194	113	50.3136	17.5704	35.776	1	72	High grade papilary serous	IIIC	DM	Cataract surgery
27	04346486	31.5806	68.3	48.5318	23.6878	66.6383	1	60	Mucinous	IA	HBV carrier	C/S
28	04362334	22.9024	189	47.5	41.4228	58.4026	1	82	Mucinous	IA	Hypertension, Dementia	Cholecystectomy, C/sec
29	04379353	403.683	425	27.7818	93.0645	95.4717	1	54	High grade papilary serous	IIIC		C/sec, Appendectomy
30	04395588	45.5366	155	32.6091	48.7582	69.8219	1	54	Endometroid	IA
31	04414963	29.0732	82.5	17.5864	21.6431	49.804	0	43	Clear	IA
32	04422026	823.512	822	28.2727	97.8216	97.8386	1	65	High grade papilary serous	IVB	Hypertension	C/sec
33	04422458	14.0323	56.1	35.0773	9.53436	41.0644	0	39	High grade papilary serous	IA	Asthma	tumorectomy, TAH BSO
34	04422806	238.366	48	50.7636	7.98872	94.5591	0	31	Metastatic adenocarinoma	IA
35	04428360	835.585	655	45.6091	97.2854	98.3958	1	57	Endometroid	IC		C/sec
36	04431441	375.902	533	81.05	94.1582	97.3889	1	74	High grade papilary serous	IIIA2	Hypertension	PTCA, TKR(Lt), spine
37	04431474	22.5854	45.5	100.236	6.18788	68.461	0	45	Mucinous	IA	Hypertension
38	04433239	25.6829	45	23.2318	14.7402	50.7258	1	48	serous boderline	IA		LSO
39	04442335	416.829	144	12.3227	81.6757	93.0346	1	58	High grade papilary serous	IIIC	Diabetes, Hyperlipidemia	C/sec
40	04444262	32	66.2	24.1636	23.2778	57.0815	1	75	High grade papilary serous	IA	Hypertension, A-fib, CI	Cardiac valve surgery, Cholecystectomy
41	04447908	14.6829	231	36.3773	38.6219	42.7649	1	80	Mucinous	IA	Diabetes, Dementia, PD	Hip surgery
42	04475020	10.2439	108	17.2227	17.9837	24.5467	1	64	Mesonephric-like carcinoma	IC2	idiopathic myelofibrosis	Uveitis surgery
43	04480619	1.77419	116	10.25	6.14232	3.59483	1	55	Low grade serous	IVB
44	04493287	283.683	983	65.5136	96.1226	96.0573	1	65	High grade papilary serous	IIIC	Hypertension
45	04497767	12.7805	36.8	16.3318	3.699	28.4724	0	29	Mucinous	IA
46	04505313	59.5323	59.3	23.4955	29.8855	71.5932	1	51	Serous borderline tumor	IA		P/S RSO (cellular fibroma)
47	04506833	821.902	243	51.2682	92.6606	98.4775	1	58	High grade papilary serous	IIIA2	Thyroid Ca	Thyroid lobectomy, C/sec
48	04507799	1.27419	53.8	94.2773	2.2578	9.10798	1	54	Clear	IA	Breast Ca	M c SLNBx, Rt(2013), Appendectomy(2020)
49	04523096	22.561	52.9	15.3136	15.6859	41.1121	1	60	Metastatic adenocarinoma	IA	s-colon Ca	LAR
50	04566573	326.537	803	27.7273	95.7021	94.3914	1	83	Endometroid	IA
51	04569172	561	2407	47.0909	99.0444	97.6214	1	79	High grade papilary serous	Ova Ca IIIC -> Recur	Hypertension
52	04586615	269.439	777	19.8091	94.9222	91.8127	1	65	High grade papilary serous	IVB	Cardiac disease
53	04594713	3.21951	185	113.309	14.1249	22.971	1	66	Clear	IA
54	04599041	7.79032	132	71.5273	18.1061	36.5054	1	54	High grade papilary serous	IVB
55	04601636	6.53226	59.1	9.77727	10.2115	12.5652	0	49	Mucinous	IA		C/S, H/S M/M
56	04612241	577.839	116	11.6955	81.8874	94.8128	1	52	Clear	IIB		C/S
57	04617573	207.758	599	10.5182	92.1817	85.3283	1	69	High grade papilary serous	IVB	Hypertension, Hyperlipidemia	Hysterectomy
58	04624565	4.74194	92.3	48.3864	9.58132	21.1829	1	70	High grade papilary serous	IVB	DM, HTN Thyroid Ca	Partial thyroidectomy
59	04625168	18.878	54.3	71.35	14.3677	59.3992	1	65	Mucinous	IA	Leiomyoma	subtotal hysterectomy
60	04631310	0.902439	44.5	41.0591	4.86532	4.04464	0	49	Clear	IC3
61	04632179	119.537	53.3	26.6864	9.64056	85.0427	0	20	Clear	IA
62	04632740	573.952	616	9.98182	96.2321	94.2838	1	46	High grade papilary serous	IVA
63	04641654	108.048	67	13.6909	42.8133	77.3573	1	60	Mucinous	IA	Diabetes, Hyperlipidemia, Osteoporosis	C/S
64	04641868	1.5122	56.5	19.1909	8.52847	4.39543	0	44	adult GCT	IC3		C/sec
65	04666675	3.85366	59.8	25.7091	5.47916	12.8466	1	53	Mucinous	IC1	Hypertension, Diabetes	C/sec
66	04689952	458.806	5576	45.2545	99.5356	97.0057	1	78	High grade papilary serous	PPC IIIC	DM	Dia-lapa
67	04693537	0.463415	69.5	32.9682	12.4141	1.79285	0	49	High grade papilary serous	IA	Hypertension	Appendectomy
68	04701385	172.902	1425	11.85	96.2101	83.7317	1	78	High grade papilary serous	IIIC	Hypertension, Diabetes, Hyperlipidemia	Arthroplasty
69	04712665	0.693548	94.3	32.8773	2.58432	2.71515	1	80	Granulos cell	Ova Ca IA -> Recur	Hypertension	TAH BSO, Peritoneal mass excision
70	04717731	0.097561	75.9	13.3273	0.501161	0.203262	1	67	High grade papilary serous	IIIC2	Hyperlipidemia
71	04720255	4.59677	75.4	13.0045	7.74349	10.5334	1	67	Clear	1CII
72	04734111	162.854	81.3	22.2773	22.9065	87.6084	0	35	serous boderline	IA
73	04736119	550.732	305	89.5045	92.2653	98.3413	1	74	High grade papilary serous	IIIC	Hypertension, Hyperlipidemia	Vitrectomy, pars planar
74	04751165	741.951	989	44.6818	98.0556	98.1628	1	64	High grade papilary serous	IIIC		Appendectomy
75	04752715	8.37097	108	58.2273	15.9058	35.3977	1	76	High grade papilary serous	IVb	HTN
76	04756514	100.274	109	85.3045	36.6761	90.4924	0	43	High grade papilary serous	IIC	Cx Ca	Cx Ca Op, C/S
77	04769460	343.537	211	21.2364	85.199	93.7959	1	56	High grade papilary serous	IC
78	04783435	583.774	560	30.7773	95.9048	97.0691	1	57	High grade papilary serous	IVB -> Recur	Hypertension
79	04793328	772.244	1102	147.995	98.3083	99.1363	1	62	High grade papilary serous	IIIC	Hypertension, Diabetes, Hyperlipidemia
80	04796059	120.5	268	13.8409	83.2926	79.4202	0	49	Clear cell carcinoma, high grade	IA

## Sheet: Benign
No.	bCODE	CA125 (U/ml)	HE4 (pmol/L)	Trx1 (U/ml)	ROMA	DORA	Menopause	Age	pathology report (Ovary)	Past medical History	Past surgical history
1	04075134	0.983871	47.8	21.7707	5.74596	3.05353	0 (menstruation)	25	HSIL (CIN III)	Breast Ca, Thyroid Ca
2	04646710	0.1	81.7	12.0195	0.550644	0.19605	1 (Menopause)	57	HSIL (CIN III)	Diabetes, Breast Ca	Lt.MRM
3	04304308	17.7419	56.6	21.0049	9.84768	39.5873	0	47	Rt Ovary : Endometriosis with focal atypia	Thyroid Ca	hemithyroidectomy, P/S LOC M/M
4	04401045	1.17742	42.1	41.6976	4.35857	5.33493	0	33	Cervix : Endocervical adenocarcinoma in situ curettage : Suggestive of leiomyoma, submucosal type	APN	LEEP
5	04683880	12.9032	44.1	23.722	5.5823	33.4948	0	50	SCC in situ, Cx	Hyperlipidemia	O
6	04128854	1.80645	62.1	14.8488	10.5593	4.53705	0	37	EM polyp	Breast Ca, Hypertension	simple mastectomy
7	04232099	48.2097	43.5	13.8634	5.85126	59.4646	0	24	LSIL	Hypertension	O
8	04397996	2.70968	42.2	15.361	4.60608	6.93016	0	30	CIN III
9	04520178	1.37097	47.6	26.7756	2.10064	4.82277	1	57	ASCUS	Breast Ca, Hyperlipidemia	simple mastectomy
10	04139710	3.80645	54.7	6.29756	8.37934	5.86301	0	42	CIN III	Hypertension, Diabetes, Hyperlipidemia	O
11	04291560	0.806452	52.8	12.722	1.59489	1.81268	1	51	CIN III
12	04469587	2.5	72.1	37.8829	14.6681	10.5446	0	44	EM polyp, Nabothian cyst
13	04543262	1.91935	49.3	75.678	6.40363	11.9194	0	41	CIN III
14	04553931	1.33871	42.1	71.4293	4.39219	8.1982	0	24	CIN III		C/sec
15	04785865	92.4839	65.4	28.6537	14.592	81.9012	0	32	EM polyp
16	04763218	1.41935	46.6	23.0439	5.54583	4.58143	0	44	CIN III	Hepatitis
17	04176546	1.70968	62.8	9.18537	10.7808	3.24722	0	52	CIN III
18	04294838	1.35484	80	10.1951	3.52162	2.71908	1	79	ASCUS	Breast Ca, Osteoporosis
19	04397888	5.48387	43.1	73.3707	5.03889	28.7165	0	43	CIN III	Hypertension, Diabetes, Gastric lymphoma
20	04197312	1.33871	79.1	23.0244	3.45252	4.31651	1	66	CIN III		conization
21	04523866	0.419355	37.4	64.5756	3.12246	2.40481	0	44	CIN III, Adenomyosis, Leiomyoma
22	04126680	1.33871	46.2	20.4732	5.42053	4.03323	0	51	Leiomyoma,lipoleiomyoma, Uterine prolapse	Hypertension, Diabetes
23	04570780	1.09677	75.6	15.8683	2.86396	2.83659	1	72	Leiomyoma, Uterine prolapse	Breast Ca, Thyroid Ca	Rt lumpectomy, Lt thyroid lobectomy
24	04714607	1.46774	78	15.878	3.63289	3.82176	1	60	Uterine prolapse, Adenomyosis, Cervical polyp
25	04129294	1.75806	46.4	7.47317	2.4454	2.96184	1	56	ASCUS	Breast Ca	Lt. lumpectomy
26	04179503	0.532258	38.5	77.7805	3.38654	3.42521	0	46	CIN III	Hypertension
27	04614575	0.354839	83.1	39.878	1.40418	1.52074	1	73	CIN III	HTN, DM	Conization
28	04600378	1.22581	68.3	27.9415	2.79742	4.41515	1	59	CIN III
29	04282422	1.64516	43.9	43.4683	4.88983	7.60382	0	27	No redidual intraepithelial lesion (Bx 시 CIN III)
30	04464822	1.25806	59.4	36.6439	9.40627	5.29513	0	46	CIN III
31	04215810	0.129032	44.1	22.0634	4.24354	0.369587	0	48	No redidual intraepithelial lesion (Bx 시 CIN III), Cervical leiomyoma, endometriosis
32	04029677	0.564516	55	49.6439	7.59746	2.79824	0	49	squamous cell carcinoma in situ
33	04083520	0.629032	51.2	39.3268	1.29176	2.72799	1	62	CIN III	Angina
34	04197444	3.75806	63	24.4341	11.3401	12.2194	0	47	CIN II~III
35	04315761	1.58065	58.2	33.8244	2.85142	6.35052	1	51	No residual squamous intraepithelial lesion (past Bx CIN III), Leiomyoma, Lt paratubal cyst
36	04355222	2.06452	48.6	40.9854	6.22925	9.17099	0	27	CIN II~III	Asthma	O
37	04119419	3.74194	66.9	29.5268	12.8557	13.445	0	35	CINII-III	Hypertension, Hepatic disease	Ovarian cystectomy, Appendectomy
38	04455721	1.20968	57.5	11.4878	8.74771	2.59552	0	31	CINII-III	CKD, Proteinuria, Gout, Hepatic disease	C/sec
39	04626867	0.854839	35.7	7.8439	2.92849	1.44547	0	38	CINII-III		C/S
40	04330735	1.91935	47.5	11.9902	5.8931	4.26411	0	47	EM polyp	Hypercholesterolemia
41	04356439	1.54839	42.7	9.33659	4.57542	2.96199	0	49	CINII-III	CIS of Cx	LEEP
42	04426132	1.14516	61.4	21.761	2.39236	3.56507	1	59	CIN III	VSD	VSD repair
43	04563111	1.32258	48.9	30.3561	2.10419	4.99892	1	62	CIN II-III		C/sec, Endometriosis surgery
44	04153571	0.290323	60	33.4537	8.84361	1.11105	0	37	CIN II-III	diverticulitis, Acute appendicitis	Appendectomy
45	04529320	0.274194	47.5	93.5171	5.25274	1.9283	0	45	CIN III	Hypertension, Stroke, Hyperlipidemia	O
46	04562308	1.29032	41.5	22.3024	4.24158	4.08272	0	34	CIN III	DM, HTN	Lumbar discectomy, tonsilectomy, Knee cartilage surgery
47	04117108	1.6129	38.6	8.22927	1.90642	2.8686	1	60	Mature cystic teratoma, Lt. Ovary	CIN III, Lung Ca	LEEP, Lung resection
48	04308091	0.709677	43.5	11.5512	1.19221	1.49879	1	62	CIN III		Ovarian cystectomy
49	04423245	1.03226	53.5	7.90244	7.40301	1.76646	0	33	CIN III
50	04739166	0.306452	54	18.4439	0.810457	0.823824	1	57	CIN III	Hyperlipidemia, Thyroid Ca	total thyroidectomy
51	04331457	1.09091	41.7	18.3951	4.24537	3.07589	0	28	CIN III
52	04344132	1.21212	31.5	13.2976	2.23793	2.83406	0	33	CIN II-III	Hypertension, Hyperlipidemia, ICH	C/sec
53	04029091	0.318182	49.8	31.5268	0.766116	1.18018	1	70	1. Uterus, total hysterectomy; 1) High-grade squamous intraepithelial lesion (CIN II-III), cervix (1,4-6), with clear lines of resection (safety lateral margin; 0.3cm) 2. Adnexa, both, adnexectomy; 1) Inclusion cyts, both ovaries (12,14) 2) Walthard rest cyst, both salpinges (13,15) 3) Unremarkable, both salpinges (13,15)	Hypertension, Diabetes
54	04238466	4.68182	80.1	28.4976	18.6765	16.155	0	49	Uterine cervix, conization; 1) Consistent with high-grade squamous intraepithelial lesion (CIN II) (A1)	Hyperlipidemia
55	04792451	1.17742	42.1	41.6976	4.35857	5.33493	0	49	1. Uterus, total hysterectomy; 1) Endocervical adenocarcinoma in situ, HPV-associated, cervix (1,4), with clear lines of resection (safety margin; 1.0cm) 2) Leiomyoma, intramural type, multiple (5-8) 3) Endocervical polyp (2,3) 4) Blue nevus, endocervix (1-3) 5) Foreign body reaction, lateral side, cervix (2,3) 6) Proliferative endometrium (5,6) 2. Salpinx, both, salpingectomy; 1) Paratubal cyst,…
56	04339762	1.90909	62.7	24.6146	10.8107	6.39722	0	48	Endometrium, hysteroscopic polypectomy; Consistent with endometrial polyp with some purulent exudate	Asthma
57	04415362	1.90909	44.7	8.44878	5.13885	3.46171	0	43	Uterine cervix, punch biopsy; High-grade squamous intraepithelial lesion (CIN II-III) with glandular extension
58	04176493	0.69697	59.4	23.1415	1.61971	2.21959	1	68	Endometrium and endocervix, ? polypectomy; 1) Consistent with endocervical endometrial polyp, ? lower uterine segment 2) Atrophic endometrium 3) Some myometrium included
59	04295794	1.90909	46.3	23.3854	5.56254	6.21466	0	35	Endometrium, hysteroscopic polypectomy; Endometrial polyp showing hemorrhagic infarction	cholangitis	C/sec, Cholecystectomy
60	04344852	0.136364	47.2	20.0244	4.96766	0.369557	0	41	Uterine cervix, LEEP excision; High-grade squamous intraepithelial lesion (CIN III), labeled "exocervix and endocervix" (A,B), with 1) glandular extension 2) margin involved (A,B)
61	04503737	0.757576	64.3	9.93923	1.86492	1.4672	1	73	Uterine cervix, conization; 1) High-grade squamous intraepithelial lesion (CIN III), labeled "exocervix" (A), with uncertain lines of resection 2) High-grade squamous intraepithelial lesion (CIN III), labeled "endocervix" (B), with margin involved	Hypertension
62	04240072	1.40909	63	13.0166	2.84677	3.26584	1	49	Uterine cervix, conization; Squamous cell carcinoma in situ, labeled "exocervix and endocervix" (A1,A2,B), with 1) glandular extension 2) margin involved (A1,A2)
63	04019485	1.40909	49.7	21.4365	6.40295	4.36238	0	31	Uterine cervix, conization; High-grade squamous intraepithelial lesion (CIN III) (1-3), with 1) glandular extension 2) close to the lines of resection (2) * Immunohistochemical stain results (2); 1) p16 (block +) 2) Ki-667 (+, 90%)		Sinusitis
64	04797706	1.09091	58.8	46.6022	9.12808	5.26676	0	27	Endometrium, hysteroscopic polypectomy; Endometrial polyp
65	04359341	5.69697	69.5	14.9282	14.2251	13.832	0	50	Endometrium, hysteroscopic polypectomy; 1) Endometrial polyp showing infarct-type hemorrhagic necrosis (A1-A3,B) 2) Some myometrium included (A3,B)	DM, HTN	Sling procedure,
66	04011917	0.787879	96.2	33.4751	2.88764	3.12755	1	78	1. Uterus, total hysterectomy; 1) Squamous cell carcinoma in situ, cervix (1-5,7), with (1) glandular extension (2) close to the lines of resection (safety lateral margin; 1mm) (2) 2) Endocervical polyp and Nabothian cyst (6,7) 2. Adnexa, both, adnexectomy; 1) Inclusion cyst, left ovary (11) 2) Paratubal cyst, left (12) 3) Unremarkable, right ovary (9) and both salpinges (10,12
67	04537214	1.30303	51.1	24.0166	6.77976	4.30371	0	30	Uterine cervix, conization; 1) High-grade squamous intraepithelial lesion (CIN III), labeled "exocervix" (A1,A2), with (1) glandular extension (2) margin involved 2) Unremarkable, labeled "endocervix" (B)
68	04703869	0.454545	51.8	19.6022	6.5708	1.29033	0	43	INTERPRETATION / RESULT NEGATIVE FOR INTRAEPITHELIAL LESION OR MALIGNANCY		P/S LOC
69	04757352	1.5303	41.7	42.6575	4.33234	7.00916	0	34	High-grade squamous intraepithelial lesion (CIN III)		TLH BSO
70	04066612	1.74242	69.3	20.3591	3.64194	5.24393	1	64	High-grade squamous intraepithelial lesion (CIN II-III), labeled "exocervix"	Hypertension, ICH	C/S
71	04076044	0.712121	34.9	11.779	2.74826	1.52172	0	25	Atypical squamous cells of undetermined significance, labeled "anterior lip I and posterior lip"
72	04346843	1	49.5	52.3204	1.74305	5.15732	1	58	Endometrial polyp with foci of atypical tubal metaplasia and stromal hemorrhage	Hypertension
73	04524938	4.56061	53.4	20.674	8.0334	13.3768	0	41	Consistent with endometrial polyp
74	04391976	25.2576	54.7	20.5359	9.33483	48.4251	0	27	Consistent with endometrial polyp (	Hypertension, Hepatic disease, Meningitis
75	04415425	24.6061	56.4	33.3094	9.95517	55.0105	0	36	High-grade squamous intraepithelial lesion (CIN II), labeled "exocervix"		conization
76	04016022	1.04545	32.9	21.8564	2.45365	3.25677	0	54	Uterus, total hysterectomy; 1) No residual squamous intraepithelial lesion (post-conization state, CS2022-225), cervix (1-12) 2) Ulceration with granulation tissue proliferation and Nabothian cyst, cervix (1-12) 3) Leiomyoma, intramural and submucosal types, multiple (14,15) 4) Lipoleiomyoma, intramural type (14) 5) Suggestive of endocervical polyp (2,4,13) 6) Proliferative endometrium (13-15) 2.…
77	04253959	1.84848	43.5	22.8453	2.3739	5.93964	1	67	Atypical squamous cells of undetermined significance, labeled "exocervix"
78	04453444	3.56061	132	15.5635	11.0829	9.10465	1	84	Cornification of uterine cervix and vagina (uterine prolapse) intraglandular papillary proliferation with mucinous metaplasia, focal, endometrium Leiomyoma with hyaline degeneration and dystrophic calcification, intramural type Adenomyoma, intramural type Atrophic endometrium Chronic cervicitis with ulceration and granulation tissue proliferation
79	04243854	1.33333	54.1	9.53591	7.70013	2.57172	0	30	Atypical squamous cells of undetermined significance, labeled "exocervix"
80	04419520	1.22727	51.7	24.2928	6.93324	4.07729	0	31	Consistent with endometrial polyp
81	04194909	0.484848	51.2	16.0718	1.07002	1.22628	1	70	High-grade squamous intraepithelial lesion (CIN II), labeled "exocervix"
82	04475229	0.242424	55.9	23.674	7.49778	0.74814	0	31	High-grade squamous intraepithelial lesion (CIN III), labeled "exocervix"		P/S BOC
83	04056638	1.18182	57.4	25.9503	8.7031	4.07699	0	54	Atypical squamous cells of undetermined significance, focal, with clear lines of resection Cervical polyp with squamous metaplasia Lipoleiomyoma, submucosal type, lower uterine segment	Hyperlipidemia	Lumbar surgery
84	04748513	1.45455	52.1	29.9558	7.12257	5.45701	0	40	Atypical squamous cells of undetermined significance, labeled "exocervix and endocervix"
85	04160679	0.378788	47.2	15.5249	5.27843	0.927935	0	35	Endometrial polyp, Leiomyoma
86	04076385	0.318182	102	19.6575	1.60122	0.89018	1	74	Endometrial polyp, Leiomyoma	Dermographism
87	04584936	0.80303	57.5	14.4751	8.54513	1.948	0	32	Endometrial polyp	Papillary thyroid carcinoma	Unilateral thyroid lobectomy
88	04408617	1.5	74.2	24.6133	15.129	5.03012	0	38	Chronic endometritis	Diabetes
89	04512901	1.66667	40.9	20.1713	4.16651	4.98877	0	31	CIN II-III		C/sec
90	04520334	0.984848	38.5	7.92265	3.51486	1.68482	0	40	CIN III, Leiomyoma	Breast Ca
91	04673321	0.333333	50.9	37.5138	6.20533	1.37402	0	37	CIN III		H/S P/P
92	04218485	1.60606	72.3	67.884	3.58766	9.50064	1	72	CIN III
93	04424795	1.9697	45.5	35.8287	5.35851	8.13809	0	58	CIN II	Hypertension, Pyelonephritis, Vascular disease	Cyst removal surgery
94	04714044	0.606061	58.1	18.4475	8.6007	1.67931	0	45	SCC, Leiomyoma, Adenomyosis
95	04009661	0.833333	53	9	7.16166	1.52745	0	31	CIN II
96	04070533	0.954545	54.4	40.7238	1.85632	4.26105	1	64	Calcification cervix, vagina (Uterine prolapse)	Hyperlipidemia, Gastric bleeding
97	04346841	1.98485	52.5	19.9337	3.02091	5.90062	1	56	Leiomyoma
98	04617775	0.924242	57.6	209.133	1.92274	10.3463	1	26	H/S P/P	Hypertension, Diabetes, Breast Ca	lumpectomy
99	04343703	1.4697	49	23.0994	2.27396	4.75175	1	43	CIN II-III	Hypertension, Diabetes	C/sec
100	04000479	7.43939	73.1	13.9724	10.363	16.978	1	46	Endometrial polyp
101	04383030	0.220588	51.9	24.051	6.32549	0.684031	0	36	Endometriosis
102	04279929	280.794	52.9	36.5102	9.95455	94.4255	0	29	Endometriosis
103	04739466	39.9265	45.2	27.8112	6.30454	64.6543	0	41	Endometriosis	GB stone	2020. Lap-cholecystectomy
104	04156054	0.308824	60.8	25.5051	0.921015	1.00804	1	52	EM polyp
105	04374677	1.44118	49.9	22.3163	2.28417	4.56735	1	71	Ut prolapse		C/S, Termination of pregnancy
106	04379246	1.80882	48.6	10.25	6.18107	3.66631	0	46	Adenomyosis
107	04491329	1.77941	58.1	26.2092	9.14572	6.18218	0	42	EM polyp
108	04472733	2.01471	52.5	24.25	7.38216	6.69015	0	46	Ut prolapse		P/S BOC
109	04320920	0.588235	51.4	24.8367	6.55663	1.94165	0	44	Adenomyosis
110	04769613	1.94118	85.2	63.6939	20.1109	10.9865	0	45	Ut prolapse		P/S ROC
111	04323638	1.04412	57.4	18.0816	2.09109	2.91127	1	61	Ut prolapse		LEEP
112	04601736	0.941176	39.8	14.3571	3.78262	2.28462	0	26	EM polyp	Hypertension, Hyperlipidemia
113	04179372	19.8529	48.1	29.6786	6.94921	47.6175	0	40	Endometriosis	DM	Conization
114	04628089	0.441176	46.8	10.1429	0.910951	0.844039	1	42	ASCUS	Hypertension, Diabetes, Breast Ca	Lumpectomy
115	04026280	0.544118	46.8	10.0102	1.0605	1.04305	1	65	Hydrosalpinx	Angina, Diabetes, Ischemic stroke	H/S P/P
116	04013795	0.352941	61.7	20.5867	1.03009	1.01999	1	54	Adenomyomatous polyp
117	04640990	0.617647	67.9	81.1888	1.70242	4.08542	1	64	EM polyp	Hypertension, CBD stenosis
118	04749884	19.1029	68	68.1735	14.5181	59.0381	0	50	Endometriosis		C/S 2 times
119	04390314	0.941176	106	10.2857	3.61102	1.87614	1	71	Ut prolapse
120	04319981	0.441176	68.8	59.1378	1.3539	2.40612	1	63	Ut prolapse
121	04342100	0.220588	73.4	9.63265	0.876117	0.395044	1	53	EM polyp		Hysteroscopic surgery
122	04578088	0.0294118	42.9	29.0255	3.64517	0.0916323	0	44	EM polyp
123	04358688	47.8088	47.2	46.4949	7.01456	75.1059	0	49	Endometriosis
124	04669218	1.89706	54.2	77.6276	7.89037	11.9509	0	50	EM polyp		C/sec
125	04235198	1.32353	39.6	21.9133	3.81681	4.14678	0	43	Leiomyoma		O
126	04071973	0.455882	70.7	72.699	1.4256	2.80964	1	71	Mucinous cystadenofibroma	Pulmonary tuberculosis	C/sec
127	04472842	1.35294	36.1	49.8061	3.08973	6.77343	0	35	CIN I		C/sec
128	04735650	1.35294	53.9	50.6378	2.36118	6.83677	1	61	Mucinous cystadenofibroma	Hypertension, Renal disease
129	04221944	1.67647	65.2	19.3367	3.33356	4.89814	1	81	Mature cystic teratoma	Breast Ca	O
130	04101790	1.72059	80	10.9184	4.1668	3.61455	1	57	Ut prolapse	Hypertension, Diabetes	C/sec
131	04044234	0.205882	39.1	8.03571	3.31319	0.329443	0	39	serous cystadenoma
132	04558052	7.82353	61.2	25.6429	11.11	23.7264	0	40	EM polyp	HTN
133	04641439	2.16176	38.7	27.9847	3.72966	7.76703	0	21	CIN II	Hypothyroidism	C/S
134	04143813	1.05882	45.6	24.2143	5.19049	3.5023	0	30	EM polyp		Conization
135	04594773	1.14706	43	20.0561	4.56618	3.40545	0	35	EM polyp
136	04357223	1.52941	60.5	24.7143	2.89661	5.14111	1	56	Cellular fibroma
137	04536385	0.0735294	52.5	17.6837	0.278332	0.178833	1	50	Adenomyosis	Hyperlipidemia, Colorectal Ca	Colon cancer surgery
138	04574725	0.647059	56	15.3061	7.96645	1.60911	0	14	Mature cystic teratoma
139	04318531	23.6176	50	8.16327	7.64601	33.3942	0	25	Serous cystadenoma
140	04431228	1.20588	58.7	12.5969	2.37155	2.731	1	76	Leiomyoma	Hypertension, Liver Ca, Hyperlipidemia	endoscopic submucosal dissection
141	04381898	0.720588	63.5	25.2143	10.5172	2.41639	0	47	Serous cystadenoma
142	04557395	0.661765	72.3	21.2908	1.90745	2.00267	1	60	Stromal hyperthecosis and inclusion cyst
143	04474153	1.11765	56	42.0663	8.22094	5.08917	0	42	EM hyperplasia
144	04472493	1.10294	51.3	13.5969	6.77256	2.60576	0	37	EM polyp
145	04545406	43.1618	43.1	55.3214	5.69401	75.0455	0	27	Endometriosis
146	04124385	0.75	65.3	41.0867	1.8809	3.3516	1	62	Serous cystadenoma	Breast Ca
147	04738945	0.220588	61.3	17.3929	0.727525	0.563248	1	63	Ut prolapse
148	04701547	1.76471	53.5	8.83673	7.63643	3.27924	0	38	Endometriosis		Retinal detachment surgery, Cataract surgery
149	04797924	9.76471	44.5	18.5816	5.60365	24.4574	0	41	Endometriosis	Hyperlipidemia, Atherosclerosis, polyradiculopathy
150	04600184	0.735294	44.5	11.0663	1.25207	1.51603	1	47	EM polyp	Graves' ds
151	04243336	22.75	59.3	26.5255	11.0289	49.5211	0	51	Leiomyoma
152	04511697	2.14706	93.4	19.0867	5.66624	6.22424	1	58	EM polyp	Breast Ca	SSM
153	04661486	1.66176	333	107.643	15.7392	12.5662	1	55	CIN I-II		appendectomy, Rt. Mamo
154	04006738	101	45.7	11.9082	6.82111	74.5196	0	37	Adenomyosis	Bronchiectasis	Bronchiectasis surgery
155	04366548	10.5147	53.1	26.5918	8.32539	30.2935	0	50	Mucinous cystadenoma		P/S ROC
156	04052018	1.11765	50.5	15.602	6.54523	2.86349	0	30	EM polyp	Breast Ca	simple mastectomy
157	04177246	1.94118	49.1	28.5561	6.3501	7.06996	0	34	Serous cyst	Hypertension, Diabetes, Hyperlipidemia	FESS, TKA, Shoulder surgery
158	04492625	1.38235	67	20.1276	12.2114	4.12572	0	48	Lt Bartholin duct abscess
159	04384742	1.76471	75.1	16.4643	3.98234	4.70264	1	76	Ut prolapse	Hypertension	Lumbar surgery
160	04211445	71.2353	47.9	31.2653	7.41615	78.3534	0	24	Endometriosis	Breast Ca, Thyroid Ca	simple mastectomy, thyroid lobectomy
161	04119319	0.764706	47.4	36.0459	5.55525	3.16741	0	14	Mature cystic teratoma	MDD
162	04726216	1.10294	42.8	27.1888	4.5075	3.90503	0	17	Mature cystic teratoma
163	04426026	0.485294	70.8	25.3622	1.49353	1.60998	1	63	Ut prolapse	Hypertension, Diabetes
164	04210811	1.36765	62.9	25.3265	10.6832	4.65964	0	45	Mature cystic teratoma		P/S LOC
165	04382039	1.97059	72	14.5561	4.12599	4.89601	1	66	Mucinous cystadenofibroma		C/sec
166	04532442	1.92647	63	32.25	3.55309	7.51145	1	72	Serous cystadenofibroma
167	04213418	1.79412	71.6	20.4388	3.84127	5.41166	1	62	Ut prolapse	SLE
168	04160034	0.25	135	19.9031	1.79283	0.696439	1	75	EM polyp
169	04780047	34.9412	45.8	45.602	6.44199	68.1612	0	26	Endometriosis	Hypertension, CKD, TIA	C/sec
170	04352752	1.92647	56.5	15.6786	3.18477	4.99413	1	72	Ut prolapse		Hernia, Enteropexy
171	04705831	0.808824	44.5	44.602	4.83368	3.79674	0	34	EM polyp	Breast Ca	C/sec, Lt. lumpectomy
172	04763822	1.73529	50.4	58.3112	6.68623	9.41595	0	23	Mature cystic teratoma
173	04053076	1.36765	54.1	32.3163	7.71144	5.358	0	53	Mucinous cystadenoma
174	04576618	0.735294	44.5	24.5867	4.80631	2.43093	0	44	CIN I-II
175	04002559	0.352941	104	25.6071	1.75987	1.16182	1	72	Adenomyoma	Hypertension	C/sec
176	04722526	1.58824	55.8	29.6173	8.32324	5.91853	0	50	EM polyp		O
177	04371137	13.5441	59.3	43.8469	10.7143	43.4349	0	32	Endometriosis	Hypertension
178	04542810	13.2794	42.4	52.1378	5.1179	45.499	0	22	Endometriosis	Hypertension, Hepatic steatosis	P/S hematoma evacuation, A/L, Rt parovarian cystectomy
179	04346080	1.44118	54.1	44.0969	7.7348	6.73149	0	39	Mature cystic teratoma
180	04304337	0.514706	63.1	28.0714	10.1822	1.8176	0	31	atypical polypoid adenomyoma	Hypertension, Depression	Sling OP, cystocele & rectocele repair, Cholecystectomy
181	04651212	0.439024	67.9	21.6244	1.33102	1.3193	1	64	Ut prolapse
182	04447599	27.0976	56	24.6488	9.85787	53.0316	0	38	EM polyp
183	04736582	0.097561	59.6	65.7171	0.390181	0.530383	1	61	Seromucinous cystadenoma	Diabetes	Sterilization surgery
184	04102237	0.512195	82.2	70.8293	1.80885	3.11821	1	76	Ut prolapse	Hypertension, Diabetes, Hyperlipidemia	C/sec
185	04058566	17.6098	48.9	34.8634	7.15736	46.8796	0	38	Endometriosis	Variant angina	C/sec
186	04795264	1.41463	129	18.9902	5.83109	4.08366	1	81	Ut prolapse	Osteoporosis, Thyroid nodule	LEEP
187	04615237	1.87805	52	14.3756	2.87659	4.6313	1	48	Endocervical polyp	hypothyroidism	Lumpectomy
188	04540128	1.12195	63.9	23.6927	2.45507	3.66844	1	62	ASCUS
189	04668564	4.14634	43.6	43.278	5.08671	17.9007	0	17	Paratubal cyst	Breast Disease
190	04627798	0.853659	58.4	17.3707	1.84185	2.31105	1	64	CIN II
191	04417475	1.29268	42.5	18.6878	4.4783	3.69177	0	18	Mature cystic teratoma	hypothyroidism, thyroid nodule
192	04764923	0.536585	48.7	18.0732	5.78095	1.46162	0	27	Mature cystic teratoma		P/S BOC
193	04095379	13.2195	60.1	16.6976	11.0084	29.4819	0	45	Endometriosis		P/S BOC
194	04443546	1.92683	48.7	7.61951	2.7417	3.29036	1	70	CIN II	Hypertension, Hyperlipidemia, Pyelonephritis
195	04593774	1.85366	52.7	13.7561	2.88874	4.45615	1	68	stromal hyperplasia
196	04217822	1.46341	41.5	19.2537	4.2737	4.2601	0	46	Mucinous cystadenofibroma
197	04475496	1.80488	45.9	36.4146	5.43695	7.54173	0	33	Mature cystic teratoma	Hypothyroidism
198	04395121	1.60976	46.6	22.1902	5.58726	5.08837	0	28	Endometriosis
199	04709577	1.43902	38.9	14.8439	3.68253	3.60199	0	43	Parovarian cyst
200	04678193	14.8049	43.5	50.2	5.45716	47.7903	0	28	CIN I-II		C/sec
