# Supplementary material for: Towards a Universal Ovarian Cancer Biomarker Model: Clinical Validation of Trx1 and CA125 Dual Strategy
Source: Research Square preprint supplement (doi:10.21203/rs.3.rs-7359728/v1), 2025-09-22
Supplement: Supplementary file 2 [file 5ba252ac50bdcca2e72e8faa.docx]

**Supplementary data**

**Table S1. Clinical Characteristics of Participants**

| **Variables** | **Cancer** | **Benign** |
| --- | --- | --- |
| **Number** | **80** | **200** |
| **Age ± SD** | 58.7 ± 14.3 | 46.9 ± 15.7 |
| **P value** | < 0.001 | |
| **Age** |  |  |
| ≤30s | 7 (8.75%) | 69 (34.50%) |
| 40s | 16 (20.00%) | 51 (25.50%) |
| 50s | 18 (22.50%) | 31 (15.50%) |
| 60s | 20 (25.00%) | 26 (13.00%) |
| ≥70s | 19 (23.75%) | 23 (11.50%) |
|  |  |  |
| **Menopausal status** |  |  |
| Pre | 21 (26.25%) | 126 (63.00%) |
| Post | 59 (73.75%) | 74 (37.00%) |
|  |  |  |
| **Obstetric history** |  |  |
| Yes | 69 (86.25%) | 139 (69.50%) |
| No | 11 (13.75%) | 61 (30.50%) |
|  |  |  |
| **Histology** |  |  |
| ***Ovarian cancer*** |  |  |
| *Serous* | *42 (52.50%)* | - |
| High grade | 37 (46.25%) | - |
| Low grade | 1 (1.25%) | - |
| Boderline | 4 (5.00%) | - |
| *Non-serous* | *33 (41.25%)* | - |
| Mucinous | 14 (17.50%) | - |
| Clear cell | 10 (12.50%) | - |
| Granulos cell | 5 (6.25%) | - |
| Endometroid | 4 (5.00%) | - |
| *NOS* | *5 (6.25%)* | - |
| ***Controls*** |  |  |
| *Cervical carcinomas& neplasia* |  | 80 (40.00%) |
| Cervical intraepithelial neoplasia | *-* | 63 (31.50%) |
| Atypical squamous cells | *-* | 10 (5.00%) |
| Squamous cell carcinoma in situ | *-* | 5 (2.50%) |
| Endocervical adenocarinoma in situ | *-* | 2 (1.00%) |
| *Ulterine& Cervix disorders, benign* |  | 91 (45.50%) |
| Adenomyoma | *-* | 1 (0.50%) |
| Adenomyomatous polyp | *-* | 1 (0.50%) |
| Adenomyosis | *-* | 5 (2.50%) |
| Atypical polypoid adenomyoma | *-* | 1 (0.50%) |
| Bartholin duct abscess | *-* | 1 (0.50%) |
| Chronic endometritis | *-* | 1 (0.50%) |
| Endometrial polyp | *-* | 36 (18.00%) |
| Endometiral hyperplasia | *-* | 1 (0.50%) |
| Endometriosis | *-* | 17 (8.50%) |
| Hydrosalpinx | *-* | 1 (0.50%) |
| Leiomyoma | *-* | 8 (4.00%) |
| Ulterine prolapse | *-* | 16 (8.00%) |
| Low grade squamous intraepithelial lesion | *-* | 1 (0.50%) |
| Endocervical polyp | *-* | 1 (0.50%) |
| *Ovarian disorders, benign* |  | 29 (14.50%) |
| Mature cystic teratoma | *-* | 11 (5.50%) |
| Mucinous cystadenofibroma | *-* | 4 (2.00%) |
| Mucinous cystadenoma | *-* | 2 (1.00%) |
| Paratubal cyst | *-* | 1 (0.50%) |
| Parovarian cyst | *-* | 1 (0.50%) |
| Seromucinous cystadenoma | *-* | 1 (0.50%) |
| Serous cyst | *-* | 1 (0.50%) |
| Serous cystadenofibroma | *-* | 1 (0.50%) |
| Serous cystadenoma | *-* | 4 (2.00%) |
| Stromal hyperplasia | *-* | 1 (0.50%) |
| Stromal hyperthecosis and inclusion cyst | *-* | 1 (0.50%) |
| Cellular fibroma | *-* | 1 (0.50%) |
|  |  |  |
| ***FIGO stage*** |  |  |
| *I - II* | *35 (43.75%)* | - |
| *III - IV* | *34 (42.50%)* | - |
| NA | 11 (13.75%) | - |

**Table S2. Mean Value of Each Biomarker**

| **Variables** | **OC** | **Control** | **P-value** |
| --- | --- | --- | --- |
| CA125 (U/mL, 95% CI) | 217.00 (158.0 - 277.0) | 6.43 (3.16 - 9.71) | <0.001 |
| HE4 (pmol/L, 95% CI) | 386.00 (214.0 - 558.0) | 58.0 (54.4 - 61.5) | <0.001 |
| Trx1 (U/mL, 95% CI) | 39.20 (32.1 - 46.4) | 28.8 (25.7 - 31.9) | 0.04 |

**Table S3. Comparison of Clinical Performance of Each Biomarker**

| **Variable** | **Cut-off** | **Sensitivity (95% CI)** | **Specificity (95% CI)** | **AUC(95% CI)** |
| --- | --- | --- | --- | --- |
| CA125 | 35 U/mL | 53.75 (42.2 - 65.0) | 96.00 (92.3 - 98.3) | 0.872(0.827 - 0.909) |
| HE4 | 60.5 pmol/L* | 73.75 (62.7 - 83.0) | 71.00 (64.2 - 77.2) | 0.815(0.765 - 0.859) |
| Trx1 | 30.4 U/mL | 47.50 (36.2 - 59.0) | 71.00 (64.2 - 77.2) | 0.588(0.528 - 0.646) |

*<40 yr: ≤60.50 pmol/L; 40-49 yr: ≤76.20 pmol/L; 50-59 yr: ≤ 74.3 pmol/L; 60-69 yr: ≤ 82.90 pmol/L; ≥70 yr: ≤104.00 pmol/L

**Table S4. Logistic Regression Analysis Formula**

| **No.** | **Variables** | | | **Logistic regression** |
| --- | --- | --- | --- | --- |
| 1 | Trx1 | CA125 |  | = -5.2987803+0.6031702*LN(Trx1)+1.0569049*LN(CA125) |
| 2 | Trx1 |  | HE4 | = -3.36309 + 0.0071977*LN(Trx1) + 0.027003*LN(HE4) |
| 3 |  | CA125 | HE4 | = -3.20844 + 0.020201*LN(CA125) + 0.022415*LN(HE4) |
| 4 | Trx1 | CA125 | HE4 | = -3.43072 + 0.0089423*LN(Trx1) + 0.020206*LN(CA125) + 0.021454*LN(HE4) |

**Table S5. Comparison of Biomarker Expression Levels based on Clinical Characteristics of Ovarian Cancer Patients**

| **Variables** | **N (%)** | **CA125 (95% CI)** | **P Value** | **HE4 (95% CI)** | **P Value** | **Trx1 (95% CI)** | **P Value** |
| --- | --- | --- | --- | --- | --- | --- | --- |
| **Age** |  |  |  |  |  |  |  |
| ≤30s | 7 (8.75) | 78.90  (-9.11 - 167.00) | 0.17 | 52.80  (39.30 - 66.30) | <0.001*** | 27.90  (17.10 - 38.60) | 0.31 |
| 40s | 16 (20.00) | 112.00  (-1.63 - 225.00) | 144.00  (58.30 - 229.00) | 34.50  (17.80 - 51.20) |
| 50s | 18 (22.50) | 289.00  (139.00 - 440.00) | 197.00  (105.00 - 289.00) | 32.50  (21.60 - 43.40) |
| 60s | 20 (25.00) | 225.00  (94.50 - 355.00) | 369.00  (187.00 - 551.00) | 47.30  (25.40 - 69.10) |
| ≥70s | 19 (23.75) | 281.00  (144.00 - 418.00) | 909.00  (230.00 - 1588.00) | 45.40  (33.10 - 57.60) |
|  |  |  |  |  |  |  |  |
| **Menstruation** |  |  |  |  |  |  |  |
| Menses | 21 (26.25) | 82.70  (10.80 - 155.00) | 0.01* | 95.60  (54.60 - 137.00) | <0.001*** | 34.00  (21.50 - 46.50) | 0.41 |
| Menopause | 59 (73.75) | 265.00  (191.00 - 339.00) | 489.00  (261.00 - 717.00) | 41.10  (32.40 - 49.80) |
|  |  |  |  |  |  |  |  |
| **Obstetric history** |  |  |  |  |  |  |  |
| Obstetric history | 69 (86.25) | 232.00  (166.00 - 298.00) | 0.66 | 420.00  (223.00 - 617.00) | 0.11 | 40.70  (32.60 - 48.90) | 0.9 |
| No history | 11 (13.75) | 127.00  ( -19.50 - 273.00) | 170.00  (-16.10 - 356.00) | 30.00  (21.90 - 38.10) |
|  |  |  |  |  |  |  |  |
| His-pathological results |  |  |  |  |  |  |  |
| High grade papillary serous | 37 | 362.00  (269.00 - 455.00) | <0.001*** | 693.00  (343.00 - 1043.00) | <0.001*** | 44.60  (32.60 - 56.60) | 0.45 |
| Low grade papillary serous | 1 | 1.77  (NA) | 116.00  (NA) | 10.30  (NA) |
| Serous boderline | 4 | 62.30  (-51.10 - 176.00) | 56.30  (26.70 - 85.90) | 22.40  (20.30 - 24.50) |
| Clear cell | 10 | 143.00  (-41.90 - 327.00) | 101.00  (49.10 - 152.00) | 34.70  (7.78 - 61.70) |
| Granulos cell | 5 | 3.36  (-2.76 - 9.48) | 62.70  (31.90 - 93.60) | 52.70  (-0.77 - 106.00) |
| Endometroid | 4 | 304.00  (-304.00 - 912.00) | 435.00  (-115.00 - 984.00) | 36.50  (23.90 - 49.10) |
| Mucinous | 14 | 47.30  (2.32 - 92.30) | 107.00  (52.30 - 162.00) | 35.50  (21.10 - 50.00) |
| Others | 5 | 84.50  (-34.90 - 204.00) | 65.70  (35.10 - 96.20) | 26.80  (9.22 - 44.40) |
|  |  |  |  |  |  |  |  |
| **FIGO stage** |  |  |  |  |  |  |  |
| I | 33 | 88.10  (19.80 - 156.00) | <0.001*** | 132.00  (73.00 - 191.00) | <0.001*** | 38.50  (27.90 - 49.00) | 0.77 |
| II | 2 | 339.00  (-2695.00 - 3373.00) | 113.00  (68.00 - 157.00) | 48.50  (-419.00 - 516.00) |
| III | 22 | 418.00  (301.00 - 535.00) | 872.00  (291.00 - 1453.00) | 44.50  (29.20 - 59.80) |
| IV | 12 | 255.00  (75.10 - 436.00) | 458.00  (251.00 - 666.00) | 41.60  (14.40 - 68.70) |
| NA | 11 | 140.00  (-9.50 - 290.00) | 145.00  (-43.20 - 333.00) | 26.90  (17.20 - 36.50) |

**Figures**

**Figure S1. Correlation between Clinical Variables and Individual Biomarkers for Ovarian.** (A) Correlation analysis of CA125, HE4, and Trx1 with age in patients with and without ovarian cancer. The Pearson correlation coefficient (r) is indicated. (B) Box-and-whisker plots depicting CA125, HE4, and Trx1 expression levels based on menopausal status in patients with and without ovarian cancer. (C) Box-and-whisker plots illustrating CA125, HE4, and Trx1 expression levels according to obstetric history in patients with and without ovarian cancer. A single asterisk (*) indicates p < 0.05, two asterisks (**) indicate p < 0.01, three asterisks (***) indicate p < 0.001, and ‘ns’ denotes non-significant differences.

**Figure S2. Comparison of Clinical Performance between ROMA and DORA by Age, Menses and Menopause Status.** (A) Correlation analysis between age and the ROMA and DORA algorithms in patients with and without ovarian cancer. The R value represents the Pearson correlation coefficient. (B) Box-and-whisker plot comparing the ROMA and DORA algorithms according to menopausal status. Two asterisks (**) indicate a p-value of less than 0.01, and three asterisks (***) indicate a p-value of less than 0.001. "ns" denotes a statistically non-significant result.
